# Supplementary material
Source: PubMed Central journal article supplement (PMC9879101)
Supplement: jb.00403-22-s0001.pdf [file jb.00403-22-s0001.pdf]

**SUPPLEMENT FOR**

**Phosphatidylglycerol is the lipid donor for synthesis of phospholipid-linked enterobacterial common antigen**

Kinsey N. Morris & Angela M. Mitchell

Department of Biology, Texas A&M University, College Station, TX

**SUPPLEMENTAL FIGURES**

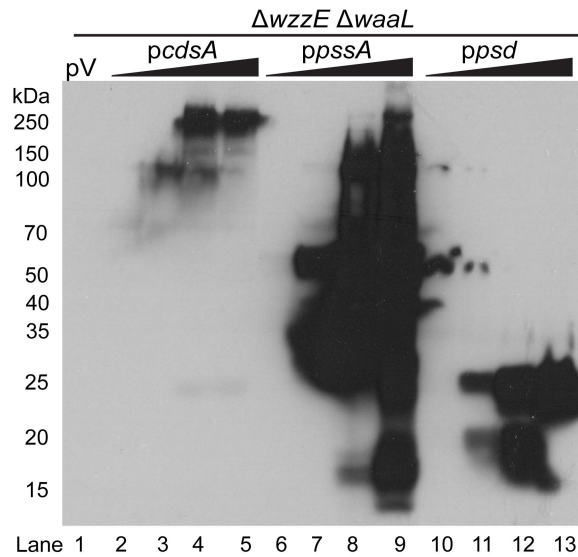

**Figure S1. Protein levels resulting from overexpression of genes involved in PE synthesis.** Expression of the indicated genes from ASKA plasmid constructs was assayed using the N-terminal His-tag included in the construct in the same strain background as in Figure 3A. The vector control (pV) was treated with 50  $\mu$ M IPTG, while the other strains were treated with increasing concentrations of IPTG (0  $\mu$ M, 10  $\mu$ M, 25  $\mu$ M, and 50  $\mu$ M). IPTG dependent increases in protein levels are observed with some aggregation occurring at higher IPTG concentrations.

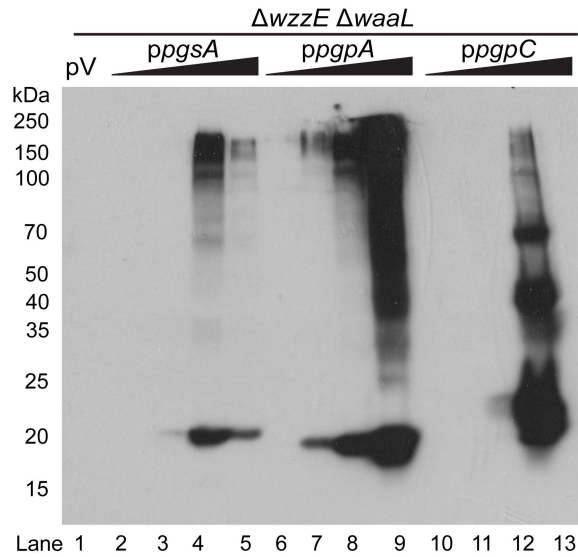

**Figure S2. Protein levels resulting from overexpression of genes involved in PG synthesis.** Expression from ASKA plasmid constructs was assayed using the N-terminal His-tag in the same strain background as in Figure 4A. The vector control (pV) was treated with 50  $\mu$ M IPTG and the other strains were treated with increasing concentrations of IPTG (0  $\mu$ M, 10  $\mu$ M, 25  $\mu$ M, and 50  $\mu$ M). IPTG dependent increases in protein levels are observed with some aggregation occurring at higher IPTG concentrations.

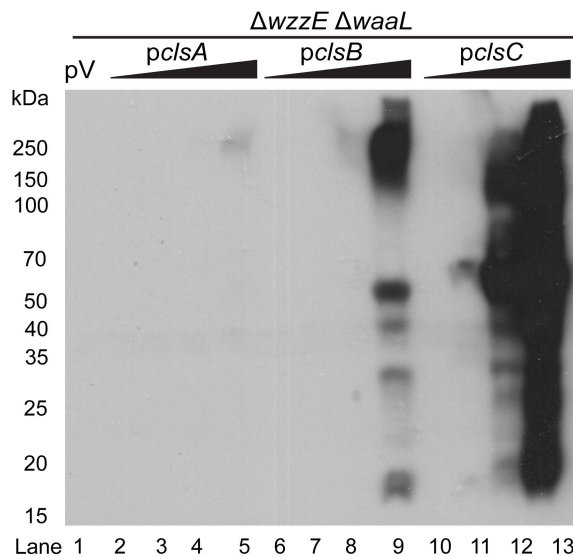

**Figure S3. Protein levels resulting from overexpression of genes involved in CL synthesis.** Expression of the indicated genes from ASKA plasmid constructs was assayed using the N-terminal His-tag included in the construct in the same strain background as in Figure 5A. The

vector control (pV) was treated with 50  $\mu$ M IPTG, while the other strains were treated with increasing concentrations of IPTG (0  $\mu$ M, 10  $\mu$ M, 25  $\mu$ M, and 50  $\mu$ M). IPTG dependent increases in protein levels are observed for ClsB and ClsC with some aggregation occurring at higher IPTG concentrations. ClsA shows lower protein accumulation.

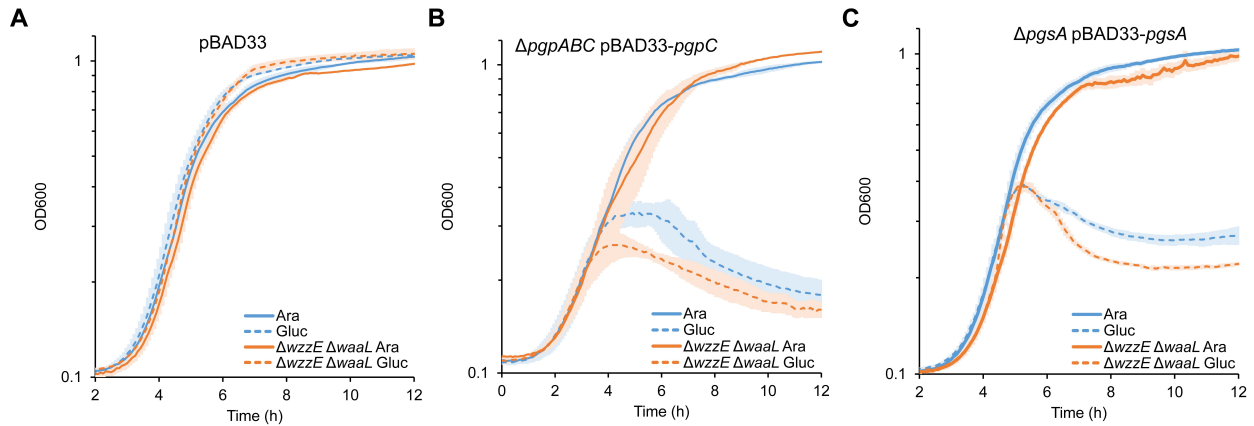

**Figure S4. PG depletion causes additional growth defects in an ECA<sub>PG</sub> only background.** Growth curves were performed strains with the indicated genotype alone (blue) or with  $\Delta wzzE \Delta waaL$  (orange) carrying a plasmid with the  $P_{BAD}$  promoter. Cultures were treated with arabinose to induce expression from the  $P_{BAD}$  promoter (solid lines) or glucose to repress expression (hashed lines). Growth curves were started with a 1:10,000 dilution of cultures grown with arabinose unless otherwise noted. Data are the mean of three biological replicates  $\pm$  the SEM. **(A)** Strains carrying an empty plasmid showed very similar growth when treated with arabinose or glucose. **(B)** Cultures grown in arabinose were diluted 1:500 for growth curves. Depletion of PgpC in strains with deletions of *pgpA*, *pgpB*, and *pgpC* caused lysis. However, strains that can make only ECA<sub>PG</sub> from ECA precursor ( $\Delta wzzE \Delta waaL$ ) lysed earlier in growth than strains that can make all three forms of ECA. **(C)** Depletion of PgsA causes more lysis in the  $\Delta wzzE \Delta waaL$  strain background than in the wild type background.

**SUPPLEMENTAL TABLE**

**Table S1: Primers used in this study**

| <b>Primer</b>                                                | <b>Sequence 5' (overlap/ANNEAL) 3'</b>                                      |
|--------------------------------------------------------------|-----------------------------------------------------------------------------|
| Del- <i>pgsA</i> F<br>( <i>pgsA</i> ::kan<br>recombineering) | AGCAACATAGGGGTAATCTTACTGACAACAGATAGTTACCCGTCATTA<br>TGATTCCGGGGATCCGTCGACC  |
| Del- <i>pgsA</i> R<br>( <i>pgsA</i> ::kan<br>recombineering) | ATCGTTTGCTGAAAATTACGCCGAAACGATCACTGATCAAGCAAATCT<br>GCGTGTAGGCTGGAGCTGCTTCG |
| pBAD33 F                                                     | CCGGGGATCCTCTAGAGTC                                                         |
| pBAD33 R                                                     | GTACCGAGCTCGAATTCG                                                          |
| <i>pgpC</i> (o/l pBAD33)<br>F                                | agcgaattcgagctcggtagcTCAGGATGTTTCAGTCCAG                                    |
| <i>pgpC</i> (o/l pBAD33)<br>R                                | cgactctagaggatccccggCTATTCCAGTTGCTGGAG                                      |
| <i>pgsA</i> (o/l pBAD33)<br>F                                | agcgaattcgagctcggtagcCTTACTGACAACAGATAGTTAC                                 |
| <i>pgsA</i> (o/l pBAD33)<br>R                                | cgactctagaggatccccggTCACTGATCAAGCAAATC                                      |
| <i>clsA</i> (o/l pBAD33) F                                   | agcgaattcgagctcggtagcACAATGCGCTTTCAAAG                                      |
| <i>clsA</i> (o/l pBAD33) R                                   | cgactctagaggatccccggTTACAGCAACGGACTGAAG                                     |
